# Supplementary material for: Vitamin D deficiency as a risk factor for infection, sepsis and mortality in the critically ill: systematic review and meta-analysis
Source: Springer Nature journal article supplement (doi:10.1186/s13054-014-0660-4), 2014-12-04
Supplement: MOESM7 [file 9779930]

**Table 1. Overview of publications used in the meta-analysis.**

| Author        | Year of Publication | Study population         | Study design                      | No. of patients | Endpoints                                  | Comparison (in meta-analysis) | Study* Quality |
|---------------|---------------------|--------------------------|-----------------------------------|-----------------|--------------------------------------------|-------------------------------|----------------|
| Amrein[25]    | 2014                | medical-, surgical-ICU   | retrospective, cohort             | 655             | sepsis, in-hospital mortality              | < 50 nmol/l vs > 75 nmol/l    | 7              |
| Arnson[21]    | 2012                | medical-, surgical-ICU   | prospective, cohort               | 130             | infections                                 | ≤ 50 nmol/l vs > 50 nmol/l    | 6              |
| Aygenel[24]   | 2013                | medical-ICU              | prospective, cohort               | 201             | infections, sepsis, in-hospital mortality  | < 50 nmol/l vs ≥ 50 nmol/l    | 4              |
| Braun[5]      | 2012                | medical-, surgical-ICU   | two-centre, retrospective, cohort | 1325            | sepsis, 30-day-, in-hospital mortality     | ≤ 37 nmol/l vs ≥ 75 nmol/l    | 8              |
| Braun[3]      | 2011                | surgical-ICU             | two-centre, retrospective, cohort | 2399            | infections, 30-day-, in-hospital mortality | ≤ 37 nmol/l vs ≥ 75 nmol/l    | 8              |
| Flynn[22]     | 2012                | medical-, surgical-ICU   | prospective, cohort               | 66              | infections, sepsis, in-hospital mortality  | ≤ 50 nmol/l vs > 50 nmol/l    | 2              |
| Higgins[23]   | 2012                | medical-surgical ICU     | prospective, cohort               | 196             | infections, sepsis, 30-day mortality       | ≤ 30 nmol/l vs ≥ 60 nmol/l    | 7              |
| Lucidarme[12] | 2012                | medical-, surgical-, ICU | prospective, cohort               | 134             | 30-day mortality                           | > 15-≤ 30 vs ≥ 60 nmol/l      | 5              |
| Matthews[30]  | 2012                | medical-, ICU            | prospective, cohort               | 258             | in-hospital mortality                      | ≥ 10-≤ 32 vs 67-97 nmol/l     | 3              |

|                |      |                                |                                        |      |                                      |                                  |   |
|----------------|------|--------------------------------|----------------------------------------|------|--------------------------------------|----------------------------------|---|
| Moromizato[26] | 2014 | medical-,<br>surgical-,<br>ICU | two-centre,<br>retrospective<br>cohort | 3386 | sepsis                               | ≤ 37 nmol/l<br>vs<br>≥ 75 nmol/l | 8 |
| Nair[27]       | 2012 | medical-,<br>ICU               | prospective,<br>cohort                 | 100  | 30-day-,<br>in-hospital<br>mortality | < 25 nmol/l<br>vs<br>≥ 50 nmol/l | 6 |
| Remmelts[28]   | 2012 | ward,<br>medical-,<br>ICU      | prospective,<br>cohort                 | 272  | 30-day<br>mortality                  | ≤ 50 nmol/l<br>vs<br>≥ 75 nmol/l | 7 |
| Su[29]         | 2013 | medical-,<br>surgical-<br>ICU  | prospective,<br>cohort                 | 156  | 30-day<br>mortality                  | ≤ 37 nmol/l<br>vs<br>≥ 75 nmol/l | 6 |
| Venkatram[4]   | 2011 | medical-,<br>ICU               | retrospective,<br>cohort               | 437  | sepsis<br>in-hospital<br>mortality   | ≤ 50 nmol/l<br>vs<br>≥ 75 nmol/l | 4 |

---

\*Study quality assessed by the Newcastle-Ottawa-scale, see Additional file S8
